# Supplementary material
Source: MDPI journal article supplement (https://www.mdpi.com/2073-4441/13/1/66)
Supplement: s1 [file s1]

## Supplementary Material

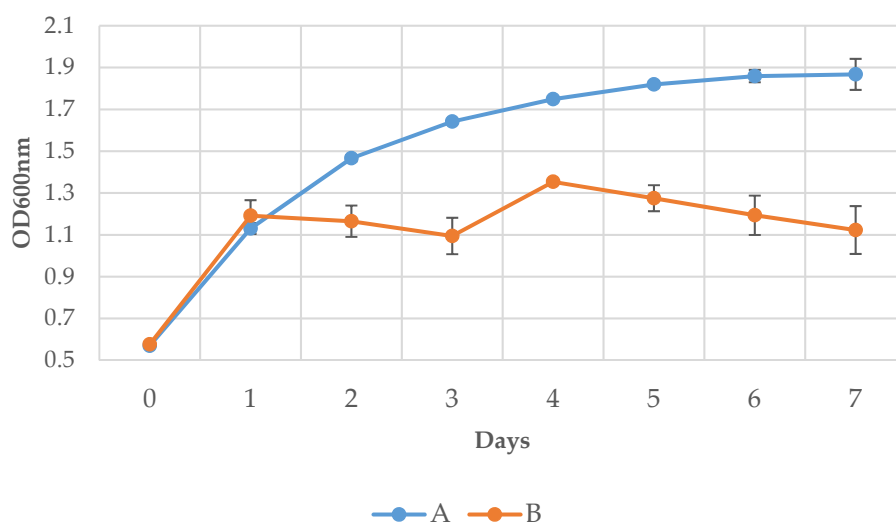

**Figure S1.** Growth of the mixture of isolates CPN1-CPN5, with sodium acetate added to the flasks daily (A) and twice a week (B) (mean values, standard deviation, n=2).

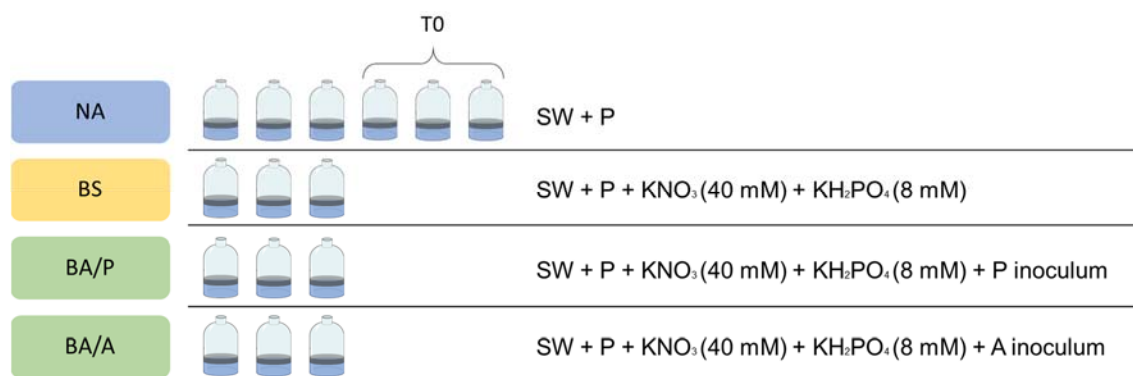

**Figure S2.** Scheme of microcosm experiment with the tested treatments: Natural attenuation (NA), Biostimulation (BS), Bioaugmentation with inoculum pre-grown in petroleum (BA/P) and bioaugmentation with inoculum pre-grown in acetate (BA/A). SW: seawater, P: petroleum, A: acetate.
